# Supplementary material for: Synergistic Effect between SARS-CoV-2 Wave and COVID-19 Vaccination on the Occurrence of Mild Symptoms in Healthcare Workers
Source: MDPI journal article supplement (doi:10.3390/vaccines11050882), 2023-04-22

**Supplementary Table S1.** Structure of the database

|                             |  |  |  |  |
|-----------------------------|--|--|--|--|
| <b>Cognome</b>              |  |  |  |  |
| <b>Nome</b>                 |  |  |  |  |
| <b>Sesso</b>                |  |  |  |  |
| <b>Data di Nascita</b>      |  |  |  |  |
| <b>Ruolo</b>                |  |  |  |  |
| <b>Reparto</b>              |  |  |  |  |
| <b>Policlinico</b>          |  |  |  |  |
| <b>Vax. Anti-Covid</b>      |  |  |  |  |
| <b>Data I Dose</b>          |  |  |  |  |
| <b>Data II Dose</b>         |  |  |  |  |
| <b>Data III Dose</b>        |  |  |  |  |
| <b>Data Positività</b>      |  |  |  |  |
| <b>Data Negatività</b>      |  |  |  |  |
| <b>Contagio 1-2-3</b>       |  |  |  |  |
| <b>Sintomatologia 0-1</b>   |  |  |  |  |
| <b>Tosse</b>                |  |  |  |  |
| <b>Febbre</b>               |  |  |  |  |
| <b>Faringite</b>            |  |  |  |  |
| <b>Rinite</b>               |  |  |  |  |
| <b>Sindrome Influenzale</b> |  |  |  |  |
| <b>Cefalea</b>              |  |  |  |  |
| <b>Anosmia</b>              |  |  |  |  |
| <b>Ageusia</b>              |  |  |  |  |
| <b>Astenia</b>              |  |  |  |  |
| <b>Congiuntivite</b>        |  |  |  |  |
| <b>Artralgia/Artrite</b>    |  |  |  |  |
| <b>Mialgia</b>              |  |  |  |  |
| <b>Diarrea</b>              |  |  |  |  |

|                            |  |  |  |  |
|----------------------------|--|--|--|--|
| <b>Dolori Addominali</b>   |  |  |  |  |
| <b>Nausea</b>              |  |  |  |  |
| <b>Vomito</b>              |  |  |  |  |
| <b>Dispnea</b>             |  |  |  |  |
| <b>Polmonite</b>           |  |  |  |  |
| <b>Linfoadenopatia</b>     |  |  |  |  |
| <b>Esantema</b>            |  |  |  |  |
| <b>Paralisi Flaccida</b>   |  |  |  |  |
| <b>Rigor Nuchalis</b>      |  |  |  |  |
| <b>Ipertransaminasemia</b> |  |  |  |  |
| <b>Ittero</b>              |  |  |  |  |
| <b>Emorragie Cutanee</b>   |  |  |  |  |
| <b>Sepsi/Shock Settico</b> |  |  |  |  |
| <b>Altro</b>               |  |  |  |  |
| <b>ricovero</b>            |  |  |  |  |

**Supplementary Table S2.** Logistic regression - Symptomatology

| OUTCOME: SYMPTOMATOLOGY |       |                       |
|-------------------------|-------|-----------------------|
| VARIABLES               | P     | ODDS RATIO – (95% CI) |
| Gender                  | 0.040 | 1.566 (1.190 – 2.060) |
| Age                     | 0.497 | 0.997 (0.988 – 1.007) |
| Vaccination             | 0.998 | 0.912 (0.523 – 1.587) |

**Supplementary Table S3.** Symptoms according to the number of vaccination doses

| VARIABLES            | Number of doses |            |           |            | P       |
|----------------------|-----------------|------------|-----------|------------|---------|
|                      | 0               | 1          | 2         | 3          |         |
| Cough                | 189 (40)        | 55 (24.8)  | 26 (14.9) | 186 (22.1) | < 0.001 |
| Fever                | 227 (48.1)      | 63 (28.4)  | 44 (25.1) | 139 (16.5) | < 0.001 |
| Pharyngitis          | 81 (17.2)       | 32 (14.4)  | 39 (22.3) | 247 (29.4) | < 0.001 |
| Rhinitis             | 87 (18.4)       | 68 (30.6)  | 47 (26.9) | 206 (24.5) | 0.003   |
| Flu syndrome         | 94 (19.9)       | 30 (13.5)  | 6 (3.4)   | 8 (1)      | < 0.001 |
| Headache             | 114 (24.2)      | 33 (14.9)  | 21 (12)   | 132 (15.7) | < 0.001 |
| Anosmia              | 125 (26.5)      | 20 (9)     | 4 (2.3)   | 3 (0.4)    | < 0.001 |
| Ageusia              | 115 (24.4)      | 14 (6.3)   | 5 (2.9)   | 4 (0.5)    | < 0.001 |
| Asthenia             | 86 (18.3)       | 16 (7.2)   | 20 (11.4) | 72 (8.6)   | < 0.001 |
| Conjunctivitis       | 18 (3.8)        | 1 (0.5)    | 2 (1.1)   | 4 (0.5)    | < 0.001 |
| Arthralgia/Arthritis | 104 (22.1)      | 25 (11.3)  | 7 (4)     | 25 (3)     | < 0.001 |
| Myalgia              | 119 (25.3)      | 23 (10.4)  | 10 (5.7)  | 31 (3.7)   | < 0.001 |
| Diarrhea             | 36 (7.6)        | 3 (1.4)    | 4 (2.3)   | 10 (1.2)   | < 0.001 |
| Abdominal Pain       | 9 (1.9)         | 0 (0)      | 1 (0.6)   | 0 (0)      | < 0.001 |
| Nausea               | 15 (3.2)        | 0 (0)      | 2 (1.1)   | 8 (1)      | 0.002   |
| Vomiting             | 4 (0.9)         | 1 (0.5)    | 1 (0.6)   | 4 (0.5)    | 0.846   |
| Dyspnea              | 21 (4.5)        | 3 (1.4)    | 3 (1.7)   | 4 (0.5)    | < 0.001 |
| Pneumonia            | 3 (0.6)         | 0 (0)      | 0 (0.0)   | 0 (0.0)    | 0.048   |
| Number of symptoms   |                 |            |           |            |         |
| 0                    | 93 (19.7)       | 69 (31.1)  | 65 (37.1) | 300 (35.7) |         |
| 1-3                  | 208 (44.3)      | 130 (58.6) | 97 (55.4) | 495 (58.9) | < 0.001 |
| ≥ 4                  | 169 (36)        | 23 (10.4)  | 13 (7.4)  | 46 (5.5)   |         |

Supplementary Figure S1. Histogram related to the epidemiological trend of infection over time

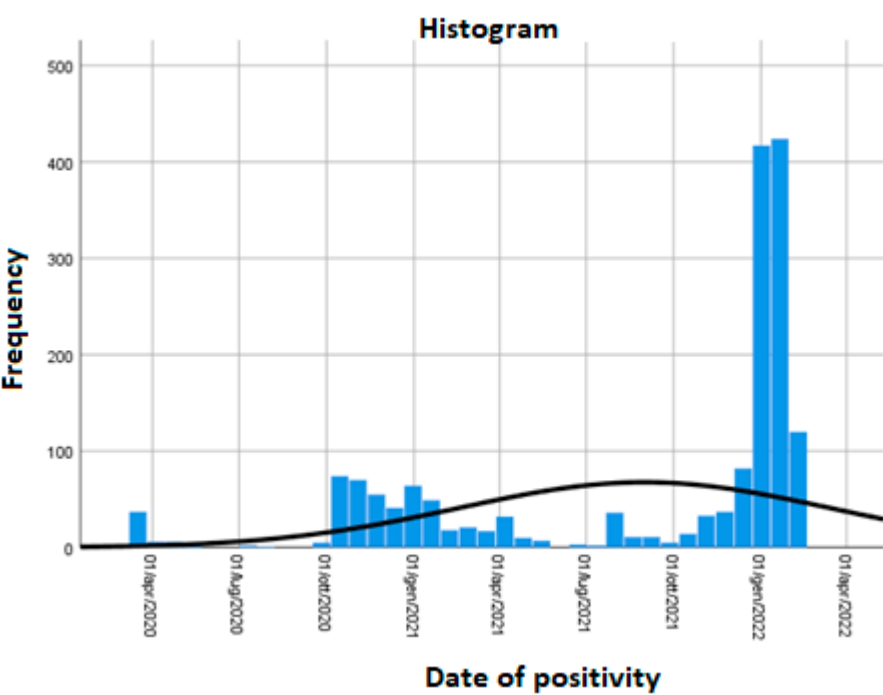

Supplement: s1 [file s1]
